# Supplementary material for: Job morale of physicians in low-income and middle-income countries: a systematic literature review of qualitative studies
Source: PubMed Central journal article supplement — BMJ Open. 2019 Dec 3;9(12):e028657. doi: 10.1136/bmjopen-2018-028657 (PMC6924858; doi:10.1136/bmjopen-2018-028657), 2019-12-03
Supplement: bmjopen-2018-028657supp001.pdf [file bmjopen-2018-028657supp001.pdf]

**Supplementary file 1. Search terms.**

morale OR well-being OR "well being" OR wellbeing OR "job satisfaction" OR burnout OR burn-out OR "burn out" OR "job motivation" OR resilience OR depression OR "depression symptoms" OR "moral distress" OR "psychological distress" OR "depressive symptoms"

AND

"health workers" OR "healthcare professionals" OR "medical doctors" OR physicians OR "medical specialists" OR clinicians OR "clinical professionals" OR "medical professionals" OR "healthcare specialists" OR audiologists OR allergists OR andrologists OR anaesthesiologists OR cardiologists OR dentists OR dermatologists OR endocrinologists OR epidemiologists OR "family doctors" OR gastroenterologists OR gynaecologists OR haematologists OR hepatologists OR immunologists OR "infectious disease specialists" OR "internal medicine specialists" OR internists OR neonatologist OR nephrologists OR neurologist OR neurosurgeons OR obstetricians OR oncologists OR ophthalmologists OR "orthopaedic surgeons" OR "ENT specialists" OR otolaryngologists OR perinatologists OR "paleo pathologists" OR parasitologists OR pathologists OR paediatricians OR physiologists OR physiatrists OR podiatrists OR psychiatrists OR pulmonologists OR radiologists OR rheumatologists OR surgeons OR urologists OR "emergency doctors"

AND

"low- and middle-income countries" OR LMICs OR "low and middle income countries" OR Afghanistan OR "Gambia The" OR Niger OR Benin OR Guinea OR Rwanda OR "Burkina Faso" OR Guinea-Bissau OR "Sierra Leone" OR Burundi OR Haiti OR Somalia OR Cambodia OR "Korea, Dem. Rep." OR "South Sudan" OR "Central African Republic" OR Liberia OR Tanzania OR Chad OR Madagascar OR Togo OR Comoros OR Malawi OR Uganda OR "Congo, Dem. Rep." OR Mali OR Zimbabwe OR Eritrea OR Mozambique OR Ethiopia OR Nepal OR Armenia OR Indonesia OR Samoa OR Bangladesh OR Kenya OR "Sao Tome and Principe" OR Bhutan OR Kiribati OR Senegal OR Bolivia OR Kosovo OR "Solomon Islands" OR "Cabo Verde" OR "Kyrgyz Republic" OR "Sri Lanka" OR Cameroon OR "Lao PDR" OR Sudan OR "Congo, Rep." OR Lesotho OR Swaziland OR "Cote d'Ivoire" OR Mauritania OR "Syrian Arab Republic" OR Djibouti OR "Micronesia, Fed. Sts." OR Tajikistan OR "Egypt, Arab Rep." OR Moldova OR Timor-Leste OR "El Salvador" OR Morocco OR Ukraine OR Georgia OR Myanmar OR Uzbekistan OR Ghana OR Nicaragua OR Vanuatu OR Guatemala OR Nigeria OR Vietnam OR Guyana OR Pakistan OR "West Bank and Gaza" OR Honduras OR "Papua New Guinea" OR "Yemen, Rep." OR India OR Philippines OR Zambia OR Albania OR Fiji OR Namibia OR Algeria OR Gabon OR Palau OR "American Samoa" OR Grenada OR Panama OR Angola OR "Iran, Islamic Rep." OR Paraguay OR Azerbaijan OR Iraq OR Peru OR Belarus OR Jamaica OR Romania OR Belize OR Jordan OR Serbia OR "Bosnia and Herzegovina" OR Kazakhstan OR "South Africa" OR Botswana OR Lebanon OR "St. Lucia" OR Brazil OR Libya OR "St. Vincent and the Grenadines" OR Bulgaria OR "Macedonia, FYR" OR Suriname OR China OR Malaysia OR Thailand OR Colombia OR Maldives OR Tonga OR "Costa Rica" OR "Marshall Islands" OR Tunisia OR Cuba OR Mauritius OR Turkey OR Dominica OR Mexico OR Turkmenistan OR "Dominican Republic" OR Mongolia OR Tuvalu Ecuador OR Montenegro

**Full electronic search strategy for one database (Pubmed)**

#4 Add Search (((morale[Title/Abstract] OR well-being[Title/Abstract] OR "well being"[Title/Abstract] OR wellbeing[Title/Abstract] OR "job satisfaction"[Title/Abstract] OR burnout[Title/Abstract] OR burn-out[Title/Abstract] OR "burn out"[Title/Abstract] OR "job motivation"[Title/Abstract] OR resilience[Title/Abstract] OR depression[Title/Abstract] OR "depression symptoms"[Title/Abstract] OR "moral distress"[Title/Abstract] OR "psychological distress"[Title/Abstract] OR "depressive symptoms"[Title/Abstract]))) AND (("health workers"[Title/Abstract] OR "healthcare professionals"[Title/Abstract] OR "medical doctors"[Title/Abstract] OR physicians[Title/Abstract] OR "medical specialists"[Title/Abstract] OR clinicians[Title/Abstract] OR "clinical professionals"[Title/Abstract] OR "medical professionals"[Title/Abstract] OR "healthcare specialists"[Title/Abstract] OR audiologists[Title/Abstract] OR allergists[Title/Abstract] OR andrologists [Title/Abstract] OR anaesthesiologists [Title/Abstract] OR cardiologists[Title/Abstract] OR dentists[Title/Abstract] OR dermatologists[Title/Abstract] OR endocrinologists[Title/Abstract] OR epidemiologists[Title/Abstract] OR "family doctors"[Title/Abstract] OR gastroenterologists[Title/Abstract] OR gynaecologists[Title/Abstract] OR haematologists[Title/Abstract] OR hepatologists[Title/Abstract] OR immunologists[Title/Abstract] OR "infectious disease specialists"[Title/Abstract] OR "internal medicine specialists"[Title/Abstract] OR internists[Title/Abstract] OR neonatologist[Title/Abstract] OR nephrologists[Title/Abstract] OR neurologist[Title/Abstract] OR neurosurgeons[Title/Abstract] OR obstetricians[Title/Abstract] OR oncologists[Title/Abstract] OR ophthalmologists[Title/Abstract] OR "orthopaedic surgeons"[Title/Abstract] OR "ENT specialists"[Title/Abstract] OR otolaryngologists[Title/Abstract] OR perinatologists[Title/Abstract] OR "paleo pathologists"[Title/Abstract] OR parasitologists[Title/Abstract] OR pathologists[Title/Abstract] OR paediatricians[Title/Abstract] OR physiologists[Title/Abstract] OR physiatrists[Title/Abstract] OR podiatrists[Title/Abstract] OR psychiatrists[Title/Abstract] OR pulmonologists[Title/Abstract] OR radiologists[Title/Abstract] OR rheumatologists[Title/Abstract] OR surgeons[Title/Abstract] OR urologists[Title/Abstract] OR "emergency doctors"[Title/Abstract]))) AND ("low- and middle-income countries" OR Imics OR "low and middle income countries" OR afghanistan OR "Gambia The" OR niger OR benin OR guinea OR rwanda OR "Burkina Faso" OR guinea bissau OR "Sierra Leone" OR burundi OR haiti OR somalia OR cambodia OR "Korea, Dem. Rep." OR "South Sudan" OR "Central African Republic" OR liberia OR tanzania OR chad OR madagascar OR togo OR comoros OR malawi OR uganda OR "Congo, Dem. Rep." OR mali OR zimbabwe OR eritrea OR mozambique OR ethiopia OR nepal OR armenia OR indonesia OR samoa OR bangladesh OR kenya OR "Sao Tome and Principe" OR bhutan OR kiribati OR senegal OR bolivia OR kosovo OR "Solomon Islands" OR "Cabo Verde" OR "Kyrgyz Republic" OR "Sri Lanka" OR cameroon OR "Lao PDR" OR sudan OR "Congo, Rep." OR lesotho OR swaziland OR "Cote divoire" OR mauritania OR "Syrian Arab Republic" OR djibouti OR "Micronesia, Fed. Sts." OR tajikistan OR "Egypt, Arab Rep." OR moldova OR timor-leste OR "El Salvador" OR morocco OR ukraine OR georgia OR myanmar OR uzbekistan OR ghana OR nicaragua OR vanuatu OR guatemala OR nigeria OR vietnam OR guyana OR pakistan OR "West Bank and Gaza" OR honduras OR "Papua New Guinea" OR "Yemen, Rep." OR india OR philippines OR zambia OR albania OR fiji OR namibia OR algeria OR gabon OR palau OR "American Samoa" OR grenada OR panama OR angola OR "Iran, Islamic Rep." OR paraguay OR azerbaijan OR iraq OR peru OR belarus OR jamaica OR romania OR belize OR jordan OR serbia OR "Bosnia and Herzegovina" OR kazakhstan OR "South Africa" OR

botswana OR lebanon OR "St. Lucia" OR brazil OR libya OR "St. Vincent and the Grenadines" OR bulgaria OR "Macedonia, FYR" OR suriname OR china OR malaysia OR thailand OR colombia OR maldives OR tonga OR "Costa Rica" OR "Marshall Islands" OR tunisia OR cuba OR mauritius OR turkey OR dominica OR mexico OR turkmenistan OR "Dominican Republic" OR mongolia OR tuvalu ecuador OR montenegro)) Sort by: PublicationDate 2475 06:23:48

#3 Add Search ("low- and middle-income countries" OR Imics OR "low and middle income countries" OR afghanistan OR "Gambia The" OR niger OR benin OR guinea OR rwanda OR "Burkina Faso" OR guinea bissau OR "Sierra Leone" OR burundi OR haiti OR somalia OR cambodia OR "Korea, Dem. Rep." OR "South Sudan" OR "Central African Republic" OR liberia OR tanzania OR chad OR madagascar OR togo OR comoros OR malawi OR uganda OR "Congo, Dem. Rep." OR mali OR zimbabwe OR eritrea OR mozambique OR ethiopia OR nepal OR armenia OR indonesia OR samoa OR bangladesh OR kenya OR "Sao Tome and Principe" OR bhutan OR kiribati OR senegal OR bolivia OR kosovo OR "Solomon Islands" OR "Cabo Verde" OR "Kyrgyz Republic" OR "Sri Lanka" OR cameroon OR "Lao PDR" OR sudan OR "Congo, Rep." OR lesotho OR swaziland OR "Cote d'Ivoire" OR mauritania OR "Syrian Arab Republic" OR djibouti OR "Micronesia, Fed. Sts." OR tajikistan OR "Egypt, Arab Rep." OR moldova OR timor-leste OR "El Salvador" OR morocco OR ukraine OR georgia OR myanmar OR uzbekistan OR ghana OR nicaragua OR vanuatu OR guatemala OR nigeria OR vietnam OR guyana OR pakistan OR "West Bank and Gaza" OR honduras OR "Papua New Guinea" OR "Yemen, Rep." OR india OR philippines OR zambia OR albania OR fiji OR namibia OR algeria OR gabon OR palau OR "American Samoa" OR grenada OR panama OR angola OR "Iran, Islamic Rep." OR paraguay OR azerbaijan OR iraq OR peru OR belarus OR jamaica OR romania OR belize OR jordan OR serbia OR "Bosnia and Herzegovina" OR kazakhstan OR "South Africa" OR botswana OR lebanon OR "St. Lucia" OR brazil OR libya OR "St. Vincent and the Grenadines" OR bulgaria OR "Macedonia, FYR" OR suriname OR china OR malaysia OR thailand OR colombia OR maldives OR tonga OR "Costa Rica" OR "Marshall Islands" OR tunisia OR cuba OR mauritius OR turkey OR dominica OR mexico OR turkmenistan OR "Dominican Republic" OR mongolia OR tuvalu ecuador OR montenegro) Sort by: PublicationDate3321846 06:23:29

#2 Add Search ("health workers"[Title/Abstract] OR "healthcare professionals"[Title/Abstract] OR "medical doctors"[Title/Abstract] OR physicians[Title/Abstract] OR "medical specialists"[Title/Abstract] OR clinicians[Title/Abstract] OR "clinical professionals"[Title/Abstract] OR "medical professionals"[Title/Abstract] OR "healthcare specialists"[Title/Abstract] OR audiologists[Title/Abstract] OR allergists[Title/Abstract] OR andrologists [Title/Abstract] OR anaesthesiologists [Title/Abstract] OR cardiologists[Title/Abstract] OR dentists[Title/Abstract] OR dermatologists[Title/Abstract] OR endocrinologists[Title/Abstract] OR epidemiologists[Title/Abstract] OR "family doctors"[Title/Abstract] OR gastroenterologists[Title/Abstract] OR gynaecologists[Title/Abstract] OR haematologists[Title/Abstract] OR hepatologists[Title/Abstract] OR immunologists[Title/Abstract] OR "infectious disease specialists"[Title/Abstract] OR "internal medicine specialists"[Title/Abstract] OR internists[Title/Abstract] OR neonatologist[Title/Abstract] OR nephrologists[Title/Abstract] OR neurologist[Title/Abstract] OR neurosurgeons[Title/Abstract] OR obstetricians[Title/Abstract] OR oncologists[Title/Abstract] OR ophthalmologists[Title/Abstract] OR "orthopaedic surgeons"[Title/Abstract] OR "ENT specialists"[Title/Abstract] OR otolaryngologists[Title/Abstract] OR perinatologists[Title/Abstract] OR "paleo pathologists"[Title/Abstract] OR parasitologists[Title/Abstract] OR pathologists[Title/Abstract] OR paediatricians[Title/Abstract] OR

physiologists[Title/Abstract] OR physiatrists[Title/Abstract] OR podiatrists[Title/Abstract] OR psychiatrists[Title/Abstract] OR pulmonologists[Title/Abstract] OR radiologists[Title/Abstract] OR rheumatologists[Title/Abstract] OR surgeons[Title/Abstract] OR urologists[Title/Abstract] OR “emergency doctors”[Title/Abstract]) Sort by: PublicationDate 601950 06:22:58

#1 Add Search (morale[Title/Abstract] OR well-being[Title/Abstract] OR “well being”[Title/Abstract] OR wellbeing[Title/Abstract] OR “job satisfaction”[Title/Abstract] OR burnout[Title/Abstract] OR burn-out[Title/Abstract] OR “burn out”[Title/Abstract] OR “job motivation”[Title/Abstract] OR resilience[Title/Abstract] OR depression[Title/Abstract] OR “depression symptoms”[Title/Abstract] OR “moral distress”[Title/Abstract] OR “psychological distress”[Title/Abstract] OR “depressive symptoms”[Title/Abstract]) Sort by: PublicationDate 393635 06:22:33
