# Supplementary material for: Job morale of physicians in low-income and middle-income countries: a systematic literature review of qualitative studies
Source: PubMed Central journal article supplement — BMJ Open. 2019 Dec 3;9(12):e028657. doi: 10.1136/bmjopen-2018-028657 (PMC6924858; doi:10.1136/bmjopen-2018-028657), 2019-12-03
Supplement: bmjopen-2018-028657supp003.pdf [file bmjopen-2018-028657supp003.pdf]

**Supplementary file 3. Quality assessment form.**

| Author, year                | 1. Was there a clear statement of the aims of the research? | 2. Is a qualitative methodology appropriate? | 3. Was the research design appropriate to address the aims of the research?   | 4. Was the recruitment strategy appropriate to the aims of the research?                                                     | 5. Was the data collected in a way that addressed the research issue? | 6. Has the relationship between researcher and participants been adequately considered? | 7. Have ethical issues been taken into consideration? | 8. Was the data analysis sufficiently rigorous? | 9. Is there a clear statement of findings? | 10. How valuable is the research?                                                  |
|-----------------------------|-------------------------------------------------------------|----------------------------------------------|-------------------------------------------------------------------------------|------------------------------------------------------------------------------------------------------------------------------|-----------------------------------------------------------------------|-----------------------------------------------------------------------------------------|-------------------------------------------------------|-------------------------------------------------|--------------------------------------------|------------------------------------------------------------------------------------|
| Wallace and Brinister, 2010 | yes                                                         | yes                                          | yes (but authors did not discuss how they decided to use qualitative methods) | can't tell (researcher has explained how participants were selected, but didn't provide reasons for selection and drop outs) | yes                                                                   | yes                                                                                     | yes                                                   | yes                                             | yes                                        | yes (but identification of new areas where research is necessary not clear stated) |
| Shah et al, 2016            | yes                                                         | can't tell                                   | yes (rationale for using qualitative methods were given)                      | yes (but drop outs were not discussed)                                                                                       | yes                                                                   | can't tell                                                                              | yes                                                   | yes                                             | yes                                        | yes                                                                                |
| Malik et al, 2010           | yes                                                         | can't tell                                   | can't tell                                                                    | yes                                                                                                                          | no                                                                    | can't tell                                                                              | yes                                                   | no                                              | yes                                        | yes                                                                                |
| Kotzee and Couper, 2006     | yes                                                         | can't tell                                   | can't tell                                                                    | no                                                                                                                           | yes                                                                   | can't tell                                                                              | yes                                                   | no                                              | yes                                        | yes                                                                                |
| Ashmore, 2013               | yes                                                         | yes                                          | yes                                                                           | yes                                                                                                                          | yes                                                                   | can't tell                                                                              | yes                                                   | no                                              | yes                                        | yes                                                                                |
| Feliciano et al, 2011       | yes                                                         | yes                                          | yes                                                                           | can't tell                                                                                                                   | yes                                                                   | can't tell                                                                              | yes                                                   | yes                                             | yes                                        | yes                                                                                |

|                     |     |            |     |            |     |            |            |            |     |            |
|---------------------|-----|------------|-----|------------|-----|------------|------------|------------|-----|------------|
| Li et al, 2017      | yes | yes        | yes | can't tell | yes | can't tell | yes        | yes        | yes | yes        |
| Liadove et al, 2017 | yes | yes        | yes | can't tell | no  | no         | can't tell | can't tell | no  | yes        |
| Luboga et al, 2010  | yes | can't tell | yes | yes        | yes | can't tell | yes        | can't tell | yes | yes        |
| Chen et al., 2017   | yes | yes        | yes | yes        | yes | can't tell | yes        | yes        | yes | can't tell |
